# Supplementary material for: Genetic diversity among the present Japanese population: evidence from genotyping of human cell lines established in Japan
Source: PubMed Central journal article supplement (PMC11194210; doi:10.1007/s13577-024-01055-0), 2024-04-19
Supplement: 13577_2024_1055_MOESM1_ESM.pdf [file 13577_2024_1055_MOESM1_ESM.pdf]

Table S1. List of 100 cell lines.

| Classification | Tissue/Histology | Cell Name   | Cell No  | Sex     | Age   |
|----------------|------------------|-------------|----------|---------|-------|
| Normal         | Lung             | HFL-I       | RCB0521  | M       | Fetus |
|                |                  | HFL-II      | RCB0522  | M       | Fetus |
|                |                  | HFL-III     | RCB0523  | M       | Fetus |
|                |                  | HFL-AE-III  | RCB0684  | UN      | 15FW  |
|                |                  | HFL-AE-VI   | RCB1613  | UN      | Fetus |
|                |                  | HFL-AE-VII  | RCB1617  | UN      | Fetus |
|                |                  | TIG-1       | RCB4467  | F       | 0     |
|                |                  | TIG-3       | RCB4468  | M       | 0     |
|                |                  | TIG-7       | RCB4469  | M       | 0     |
|                | Skin             | HFSK9t      | RCB1542  | M       | 15FW  |
|                |                  | HFSKF-II    | RCB0698  | F       | Fetus |
|                |                  | HFSKF-AE-V  | RCB1139  | UN      | Fetus |
|                |                  | HS-K        | RCB0159  | F       | UN    |
|                |                  | NB1RGB      | RCB0222  | M       | 0     |
|                |                  | NHSF46      | RCB0162  | M       | 46    |
|                | Umbilical cord   | SF8406      | RCB0584  | F       | 14    |
|                |                  | HUC-F       | RCB0153  | F       | 0     |
|                |                  | HUC-F2      | RCB0436  | F       | 0     |
|                |                  | HUC-Fm      | RCB0197  | M       | 0     |
|                | Embryo           | HUC-Fm2     | RCB0437  | M       | 0     |
|                |                  | HE16        | RCB2237  | UN      | 0     |
|                |                  | HE31        | RCB2248  | UN      | 0     |
|                | MSC              | HE40        | RCB2259  | UN      | 0     |
|                |                  | BM          | UE6E7-16 | RCB2163 | F     |
|                | UC               | UCB-TERT-21 | RCB2079  | M       | 0     |
|                | Lymphoblastoid   | CB-3512     | RCB2531  | UN      | 0     |
|                |                  | HEV0011     | HEV0011  | M       | 27    |
|                |                  | HEV0012     | HEV0012  | F       | 46    |
|                |                  | HEV0024     | HEV0024  | F       | 39    |
|                |                  | HEV0031     | HEV0031  | F       | 65    |
|                |                  | HEV0032     | HEV0032  | M       | 64    |
|                |                  | HEV0034     | HEV0034  | M       | 31    |
|                |                  | HEV0037     | HEV0037  | M       | 54    |
|                |                  | HEV0039     | HEV0039  | M       | 65    |
|                |                  | HEV0054     | HEV0054  | F       | 47    |
|                |                  | HEV0098     | HEV0098  | M       | 36    |
|                |                  | HEV0101     | HEV0101  | M       | 57    |
|                |                  | HEV0114     | HEV0114  | F       | 56    |
|                |                  | HEV0121     | HEV0121  | F       | 37    |
|                |                  | HEV0149     | HEV0149  | F       | 39    |
|                |                  | HEV0178     | HEV0178  | F       | 39    |
|                |                  | HEV0208     | HEV0208  | F       | 30    |
|                |                  | HEV0218     | HEV0218  | M       | 46    |
|                |                  | HEV0236     | HEV0236  | F       | 34    |
|                |                  | HEV0240     | HEV0240  | F       | 39    |
|                |                  | HEV0251     | HEV0251  | M       | 67    |
|                |                  | HEV0295     | HEV0295  | M       | 71    |
|                |                  | HEV0300     | HEV0300  | F       | 34    |
|                |                  | HEV0325     | HEV0325  | M       | 54    |
|                |                  | HEV0333     | HEV0333  | F       | 29    |
| HEV0380        |                  | HEV0380     | F        | 24      |       |
| HEV0388        |                  | HEV0388     | F        | 52      |       |
| HEV0404        |                  | HEV0404     | M        | 72      |       |
| HEV0410        |                  | HEV0410     | F        | 57      |       |
| HEV0421        |                  | HEV0421     | M        | 70      |       |
| HEV0498        |                  | HEV0498     | F        | 26      |       |
| HEV0500        | HEV0500          | F           | 28       |         |       |

| Classification | Tissue/Histology        | Cell Name            | Cell No | Sex     | Age |    |
|----------------|-------------------------|----------------------|---------|---------|-----|----|
| Lung cancer    | Adenocarcinoma          | A110L                | RCB2816 | M       | 61  |    |
|                |                         | A129L                | RCB3532 | M       | 64  |    |
|                |                         | A529L                | RCB2817 | M       | 72  |    |
|                |                         | B901L                | RCB3530 | F       | 72  |    |
|                |                         | HLC-1                | RCB0083 | UN      | UN  |    |
|                |                         | II-18                | RCB2093 | UN      | UN  |    |
|                |                         | LC-2 ad              | RCB0440 | F       | 51  |    |
|                |                         | LCAM1                | RCB1425 | M       | 53  |    |
|                |                         | PC-9                 | RCB4455 | M       | 45  |    |
|                |                         | RERF-LC-KJ           | RCB1313 | M       | 78  |    |
|                |                         | Large cell carcinoma | 86-2    | RCB2134 | M   | 36 |
|                |                         |                      | A904L   | RCB3531 | M   | 46 |
|                | C831L                   |                      | RCB2819 | M       | 54  |    |
|                | G603L                   |                      | RCB3529 | M       | 75  |    |
|                | IA-LM                   |                      | RCB0554 | M       | 68  |    |
|                | LU65                    |                      | RCB1967 | M       | 64  |    |
|                | Lu99                    |                      | RCB1900 | M       | 63  |    |
|                | T3M-10                  |                      | RCB1020 | M       | 40  |    |
|                | Y-ML-1B                 |                      | RCB5394 | M       | 70  |    |
|                | Squamous cell carcinoma |                      | B1203L  | RCB2818 | M   | 52 |
|                |                         | EBC-1                | RCB1965 | M       | 69  |    |
|                |                         | LC-1 sq              | RCB0455 | M       | 68  |    |
|                |                         | LK-2                 | RCB1970 | M       | 74  |    |
|                |                         | MCC138c              | RCB5007 | M       | 75  |    |
|                |                         | MCC148c              | RCB5008 | M       | 84  |    |
|                |                         | RERF-LC-AI           | RCB0444 | M       | UN  |    |
|                |                         | Sq-1                 | RCB1905 | M       | UN  |    |
|                | Small cell carcinoma    | 87-5                 | RCB2092 | M       | 64  |    |
|                |                         | Lu-134-A             | RCB0466 | M       | 80  |    |
|                |                         | Lu-135               | RCB0468 | M       | 69  |    |
|                |                         | Lu-138               | RCB1785 | M       | 78  |    |
|                |                         | Lu-139               | RCB0469 | M       | 63  |    |
|                |                         | Lu-140               | RCB0470 | M       | 53  |    |
| Lu-141         |                         | RCB1772              | F       | 67      |     |    |
| Lu-143         |                         | RCB1773              | M       | 60      |     |    |
| Lu-165         |                         | RCB1184              | M       | 50      |     |    |
| Lu-24          |                         | RCB1771              | F       | 42      |     |    |
| MS-1           |                         | RCB0725              | M       | 54      |     |    |
| S1             |                         | RCB1966              | F       | 58      |     |    |
| S2             |                         | RCB2133              | M       | UN      |     |    |
| T3M-11         | RCB1022                 | M                    | UN      |         |     |    |
| T3M-12         | RCB2281                 | M                    | UN      |         |     |    |
| WA-hT          | RCB2279                 | M                    | 56      |         |     |    |

UN: unspecified

Table S3.

S3-1. Population statistics as of December 2022.

|                           |                       |
|---------------------------|-----------------------|
| Total population estimate | 12484x10 <sup>4</sup> |
| Foreign residents         | 3,075,213             |
| Asian                     | 2,594,216             |

Data obtained from the government statistics portal (e-Stat).

S3-2. Vital Statistics as of 2013.

|                              |           |
|------------------------------|-----------|
| Total live births            | 1,042,813 |
| Both or one foreign parent   | 32,529    |
| Japanese and foreign parents | 19,532    |

Data obtained from the government statistics portal (e-Stat).

Figure S1

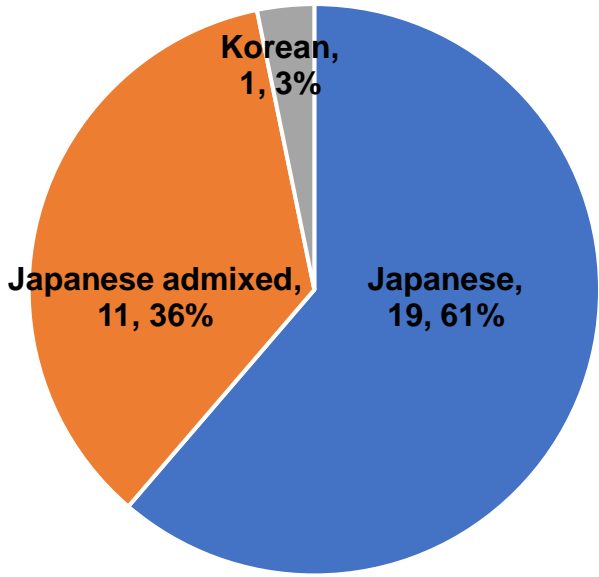

Distribution of population groups focused on 31 HEV cell lines. Japanese genotypes, including East Asian admixture, accounted for 97%, with the exception of one Korean genotype. Numbers in the graphs indicate the number of cell lines.

Figure S2

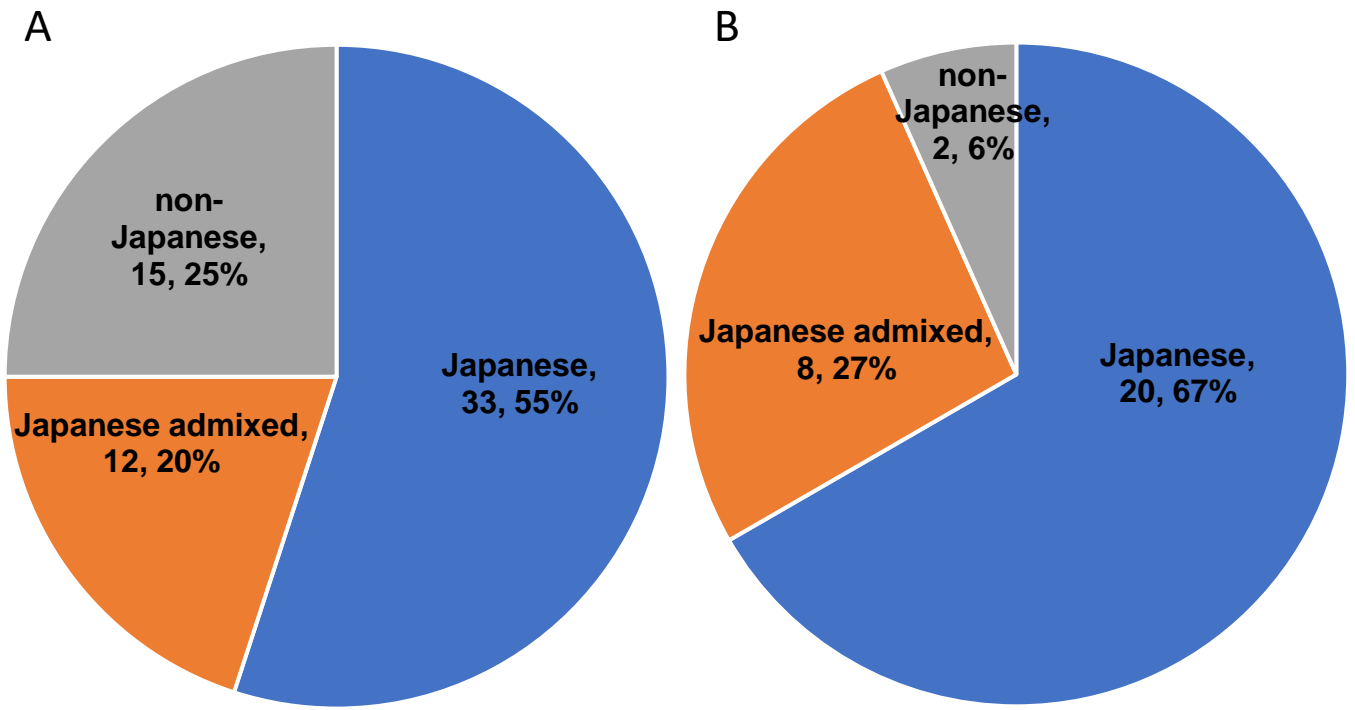

Comparison of genotypes between male (A) and female (B) cell lines. These data are based on samples of 60 males and 30 females. Differences in sample size are influenced by bias resulting from a higher number of male lung cancer patients. Numbers in the graphs indicate the number of cell lines.
